# Supplementary material for: Combination of Eribulin and Aurora A Inhibitor MLN8237 Prevents Metastatic Colonization and Induces Cytotoxic Autophagy in Breast Cancer
Source: Oxford University Press journal article supplement (doi:10.1158/1535-7163.mct-15-0688), 2016-05-27
Supplement: 15357163mct150688-sup-154281_3_supp_3496314_2725gv.docx [file 15357163mct150688-sup-154281_3_supp_3496314_2725gv.docx]

**Movie S1. Cell body tracking of MDA-MB-231LN treated with MLN8237 and/or eribulin during collagen invasion**

Representative movie of individual MDA-MB-231LN cells treated with Vehicle, MLN8237, eribulin, or MLN8237/eribulin combination, suspended in collagen, and manually tracked over the course of 23 hours toward the serum chemoattractant-containing reservoir (left side of frame). Scale bar, 20 µm.

**Movie S2. Cell body tracking of BT-549 treated with MLN8237 and/or eribulin during collagen invasion**

Representative movie of individual BT-549 cells treated with Vehicle, MLN8237, eribulin, or MLN8237/eribulin combination, suspended in collagen, and manually tracked over the course of 23 hours toward the serum chemoattractant-containing reservoir (left side of frame). Scale bar, 10 µm.
